# Supplementary material
Source: PubMed Central journal article supplement (PMC2266096)
Supplement: NIHMS40927-supplement-01.pdf [file NIHMS40927-supplement-01.pdf]

Cell, Volume 132

## **Supplemental Data**

### **Oncogenic BRAF Induces Senescence and Apoptosis through Pathways Mediated by the Secreted Protein IGFBP7**

Narendra Wajapeyee, Ryan W. Serra, Xiaochun Zhu, Meera Mahalingam, and Michael R. Green

#### **Supplemental Experimental Procedures**

##### **Antibodies**

Additional antibodies used in supplemental figures and not mentioned in the Experimental Procedures accompanying the main text include:  $\alpha$ -JUN (Upstate); and  $\alpha$ -phospho-MEK,  $\alpha$ -MEK and  $\alpha$ -RKIP, which were all obtained from Cell Signaling Technology.

##### **Deoxyuridine Triphosphate Nick-End Labeling (TUNEL) Assays**

Paraffin sections of 5  $\mu$ m thickness were tested for DNA fragmentation by the non-isotopic in situ TUNEL method using the ApopTag Peroxidase in situ Apoptosis Detection Kit Apo-Direct<sup>TM</sup> TUNEL Assay Kit (Chemicon International).

**Figure S1. Characterization of the PFF and Melanocyte KD Cell Lines.**

(A) Quantitative proliferation assays of the 17 BRAFV600E/PFF KD cell lines shown in Figure 1B. PFFs stably expressing the indicated shRNA were infected with the BRAFV600E-expressing retrovirus and after 14 days analyzed by the trypan blue exclusion assay. Growth of PFFs expressing a non-silencing shRNA (PFF-NS) relative to growth of untreated PFFs is shown. For the BRAFV600E/PFF KD cell lines, values were normalized to the growth of the corresponding PFF KD cell line in the absence of BRAFV600E expression. Error bars represent standard error.

(B) Analysis of target gene expression in the PFF and melanocyte KD cell lines. Quantitative real-time RT-PCR was used to analyze target gene expression in each of the 17 PFF (left) or melanocyte (right) KD cell lines.

(C) Confirmation of all 17 candidate genes using a second, unrelated shRNA directed against the target gene. (Left) Quantitative proliferation assays. For each of the 17 candidate genes, a second, unrelated shRNA directed against the same target gene was used to derive an independent PFF KD cell line. Each PFF KD cell line was infected with the BRAFV600E-expressing retrovirus and proliferation monitored after 14 days. Growth of BRAFV600E/PFFs is expressed relative to the growth of normal PFFs. For the BRAFV600E/PFF KD cell lines, values were normalized to the growth of the corresponding PFF KD cell line in the absence of BRAFV600E expression. (Right) Quantitative real-time RT-PCR was used to analyze target gene expression in each of the 17 PFF KD cell lines.

**Figure S2. Analysis of the BRAFV600E/Melanocyte KD Cell Lines After an Additional 15 Population Doublings, and Further Characterization of the BRAFV600E/PFF KD Cell Lines.**

(A) (Top) DNA replication assays. The BRAFV600E/melanocyte KD cell lines were allowed to undergo an additional 15 population doublings (+15 PD) and then analyzed for BrdU incorporation. Error bars represent standard error. (Bottom) Immunoblot analysis monitoring acetylation of histone 3 lysine 9 (H3K9) after an additional 15 population doublings.  $\beta$ -ACTIN (ACTB) was monitored as a loading control.

(B) Apoptosis assays (top) and DNA replication assays (bottom) of the BRAFV600E/PFF KD cell lines. Apoptosis was monitored by Annexin V-PE staining 4 days after BRAFV600E expression; DNA replication was monitored by BrdU incorporation 4 days after BRAFV600E expression.

**Figure S3. IGFBP7 Upregulation Occurs Downstream of BRAF-MEK-ERK Signaling.**

(A) IGFBP7 protein levels in CM from BRAFV600E-expressing melanocytes (top) or mRNA expression in BRAFV600E-expressing melanocytes (bottom) was monitored in the presence of increasing amounts of a MEK inhibitor. The results show that BRAFV600E-mediated induction of IGFBP7 was blocked by addition of a MEK inhibitor. Error bars represent standard error.

(B) IGFBP7 protein levels in CM from melanocytes (top) or mRNA expression in melanocytes (bottom) was monitored in the presence of BRAFV600E or a constitutively activated ERK mutant (ERK2Q103A or ERK2L73P,S151D). The results show that expression of a constitutively activated ERK mutant was sufficient to activate *IGFBP7* transcription. Collectively, the results of parts A and B demonstrate that IGFBP7 induction is downstream of BRAF-MEK-ERK signaling.

**Figure S4. A Role for the AP-1 Transcription Factor in BRAFV600E-Mediated Upregulation of IGFBP7 Expression.**

(Top) Schematic of the *IGFBP7* promoter showing a consensus binding site for the dimeric AP-1 (JUN/FOS) transcription factor located ~1 kb upstream of the transcription start-site.

(A) Chromatin immunoprecipitation (ChIP) analysis. ChIP assays were performed using extracts prepared 4 days following BRAFV600E retroviral infection. Error bars represent standard error. The results show that JUN binds to the *IGFBP7* promoter in response to BRAFV600E expression in melanocytes.

(B) AP-1 is required for BRAFV600E-mediated upregulation of IGFBP7 expression. (Left) Quantitation of *IGFBP7* mRNA levels in BRAFV600E-expressing melanocytes following treatment with a non-silencing (NS) or JUN siRNA. The results demonstrate that JUN is required for BRAFV600E-mediated induction of *IGFBP7* transcription. (Right) Quantitative real-time RT-PCR was used to analyze *JUN* mRNA levels following siRNA treatment. The results of parts A and B, in conjunction with our other results, indicate that BRAFV600E induces expression of *IGFBP7*, at least in part, through activation of ERK, which in turn activates AP-1, resulting in binding of AP-1 to the *IGFBP7* promoter and stimulation of transcription.

**Figure S5. Induction of Gene Expression by BRAFV600E and IGFBP7.**

(A) Quantitation of gene expression in BRAFV600E/melanocytes compared to melanocytes (left), rIGFBP7-treated melanocytes compared to untreated melanocytes (middle), and rIGFBP7-treated SK-MEL-28 cells compared to untreated cells (right). Gene expression was monitored by qRT-PCR in untreated and treated cells, and expressed as fold-upregulation.

(B) Melanocytes expressing either a non-silencing or IGFBP7 shRNA were monitored for BRAFV600E-induced expression of seven genes by quantitative real-time RT-PCR. Error bars represent standard error. The results show that BRAFV600E-mediated induction of all seven genes did not occur following knockdown of IGFBP7.

**Figure S6. BRAFV600E-Mediated Induction of SMARCB1 and BNIP3L is Dependent Upon and Downstream of IGFBP7.**

(A) Immunoblot analysis showing SMARCB1 and BNIP3L induction in BRAFV600E-expressing melanocytes in the presence of a non-silencing (NS) or IGFBP7shRNA.  $\beta$ -ACTIN (ACTB) was monitored as a loading control. The results show that induction of SMARCB1 and BNIP3L was blocked following IGFBP7 knockdown.

(B) Immunoblot analysis monitoring SMARCB1, BNIP3L and p16<sup>INK4a</sup> in naïve melanocytes following addition of CM from normal melanocytes, BRAFV600E/melanocytes, BRAFV600E/melanocytes stably expressing an IGFBP7 shRNA or in BRAFV600E/melanocyte CM immunodepleted of IGFBP7. The results show that addition of CM from BRAFV600E-expressing melanocytes to naïve melanocytes substantially upregulated SMARCB1 and BNIP3L, which did not occur with CM from BRAFV600E/melanocytes expressing an IGFBP7 shRNA or with CM from BRAFV600E/melanocytes following immunodepletion of IGFBP7. Collectively, the results of parts A and B demonstrate that BRAFV600E-mediated induction of SMARCB1 and BNIP3L is dependent upon and downstream of IGFBP7.

**Figure S7. IGFBP7-Dependent Inhibition of BRAF-MEK-ERK Signaling in Melanocytes Following BRAFV600E Expression or Growth Factor Stimulation.**

(A) Immunoblot of phospho-ERK and total ERK in BRAFV600E-expressing melanocytes compared to BRAFV600E-expressing melanocytes containing a non-silencing (NS) or IGFBP7 shRNA. The results confirm that phospho-ERK levels are markedly decreased in BRAFV600E/melanocytes, which are senescent. This decrease in phospho-ERK levels did not occur in BRAFV600E/melanocytes expressing an IGFBP7 shRNA.

(B) Immunoblot analysis of phospho-ERK and total ERK in naïve melanocytes following addition of CM from normal melanocytes, BRAFV600E/melanocytes, BRAFV600E/melanocytes stably expressing an IGFBP7 shRNA or in BRAFV600E/melanocyte CM immunodepleted of IGFBP7. The results show that addition of CM from BRAFV600E-expressing melanocytes to naïve melanocytes substantially decreased the level of phospho-ERK, which did not occur with the various control CMs that lacked IGFBP7.

(C) Immunoblot analysis of phospho-ERK and total ERK levels in melanocytes treated in the presence or absence of rIGFBP7 (10 µg/ml), or the presence or absence of melanocyte growth factors (1X Human Melanocyte Growth Supplement (Cascade Biologics)). Cells were treated for 48 hrs prior to harvesting cells. The results demonstrate that rIGFBP7 also blocked growth factor-induced ERK activation.

**Figure S8. Mechanism of IGFBP7-Mediated Inhibition of BRAF-MEK-ERK Signaling.**

(A) (Top) Immunoblot analysis monitoring expression of RAF inhibitory protein (RKIP), phospho-MEK1/2, total MEK1/2, phospho-ERK and total ERK in BRAFV600E-positive SK-MEL-28 cells following addition of rIGFBP7 for 0, 3, 6, 12 or 24 hours. (Bottom) Apoptosis of rIGFBP7-treated SK-MEL-28 cells was monitored by Annexin V-PE staining. Error bars represent standard error. The results show that addition of rIGFBP7 to SK-MEL-28 cells resulted in induction of RKIP and decreased levels of activated MEK1/2, corresponding with the reduced phospho-ERK levels and apoptosis.

(B) Immunoblot analysis of phospho-ERK and total ERK levels in SK-MEL-28 cells treated in the presence or absence of rIGFBP7, and following expression of a constitutively activated MEK1 mutant. The results show that ectopic expression of a constitutively activated MEK1 mutant prevented the ability of IGFBP7 to block ERK activation.

(C) Immunoblot analysis monitoring expression of RKIP, phospho-MEK1/2, total MEK1/2, phospho-ERK and total ERK in SK-MEL-28 cells treated in the presence or absence of rIGFBP7, and with a non-silencing (NS) or RKIP siRNA. The results show that following knockdown of RKIP in SK-MEL-28 cells, rIGFBP7 failed to block activation of MEK or ERK. Collectively, the results of parts A, B and C indicate that IGFBP7 inhibits ERK activation by inducing RKIP, which prevents BRAF from phosphorylating MEK.

**Figure S9. Inhibition of BRAF-MEK-ERK Signaling is Required for BRAFV600E- and IGFBP7-Induction of Senescence in Melanocytes.**

Quantitative proliferation assays showing that constitutively activated ERK2 mutants block BRAFV600E-induced (left) or IGFBP7-induced (right) senescence in melanocytes. Error bars represent standard error.

**Figure S10. Systemic Administration of rIGFBP7 Induces Apoptosis in BRAFV600E-Positive Mouse Xenografts.**

Tumors derived from the rIGFBP7 systemic administration experiment shown in Figure 5B were analyzed in a deoxyuridine triphosphate nick-end labeling (TUNEL) assay. The results show that following treatment with rIGFBP7, BRAFV600E-positive tumors were TUNEL-positive, indicating that suppression of tumor growth resulted from apoptosis.

Figure S1

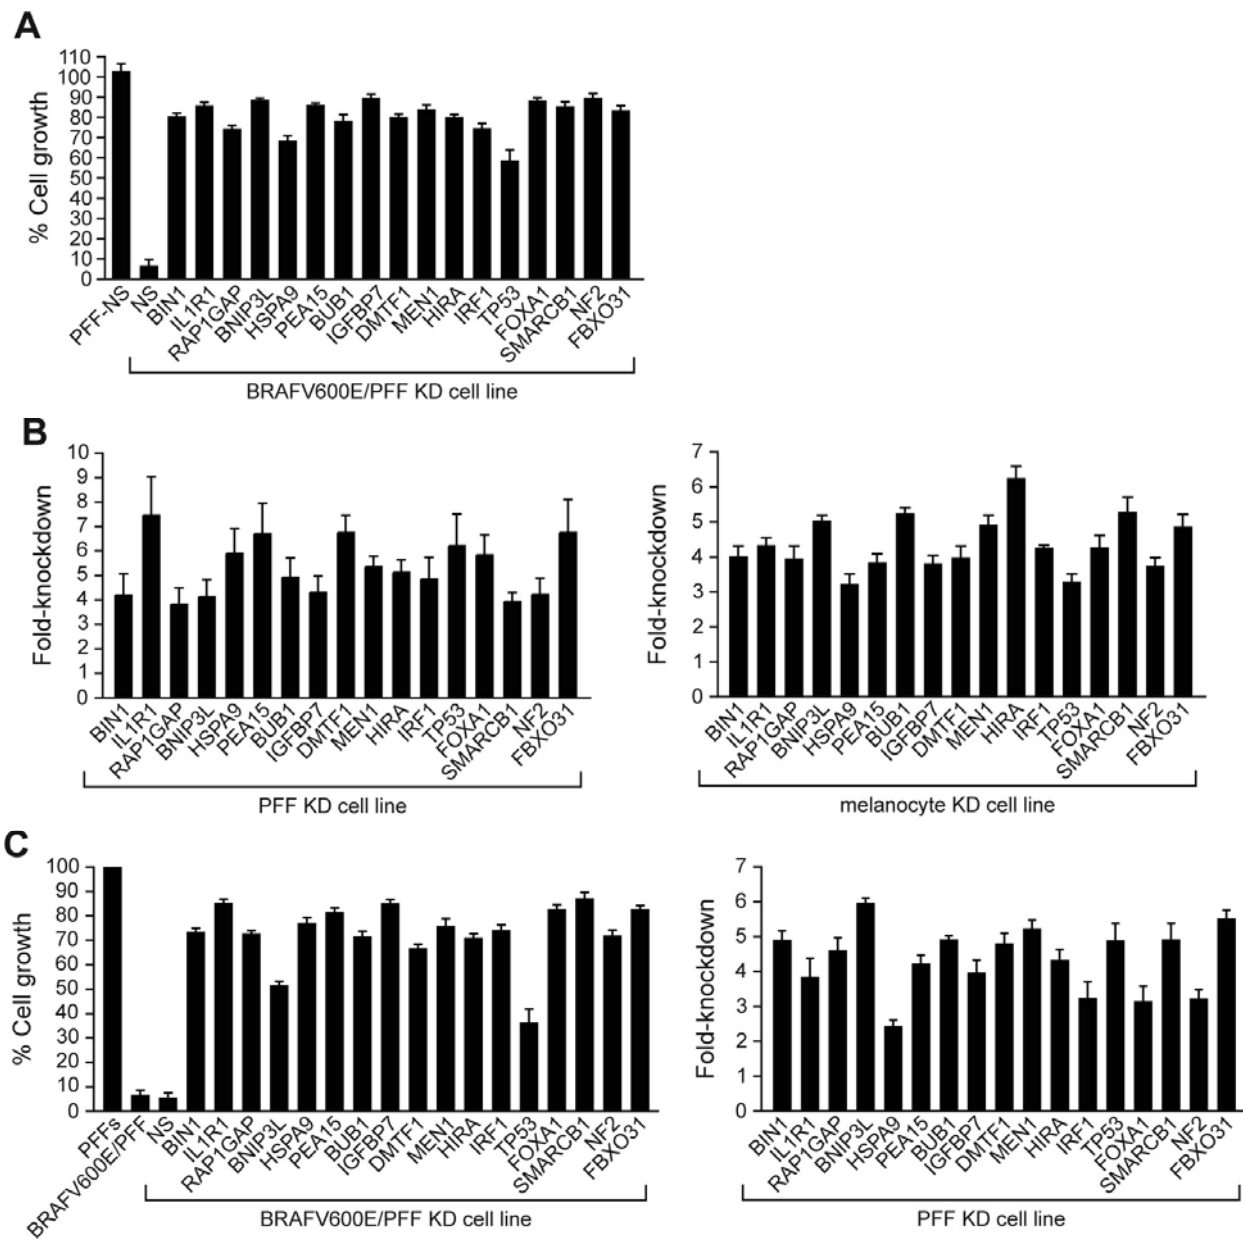

**Figure S2**

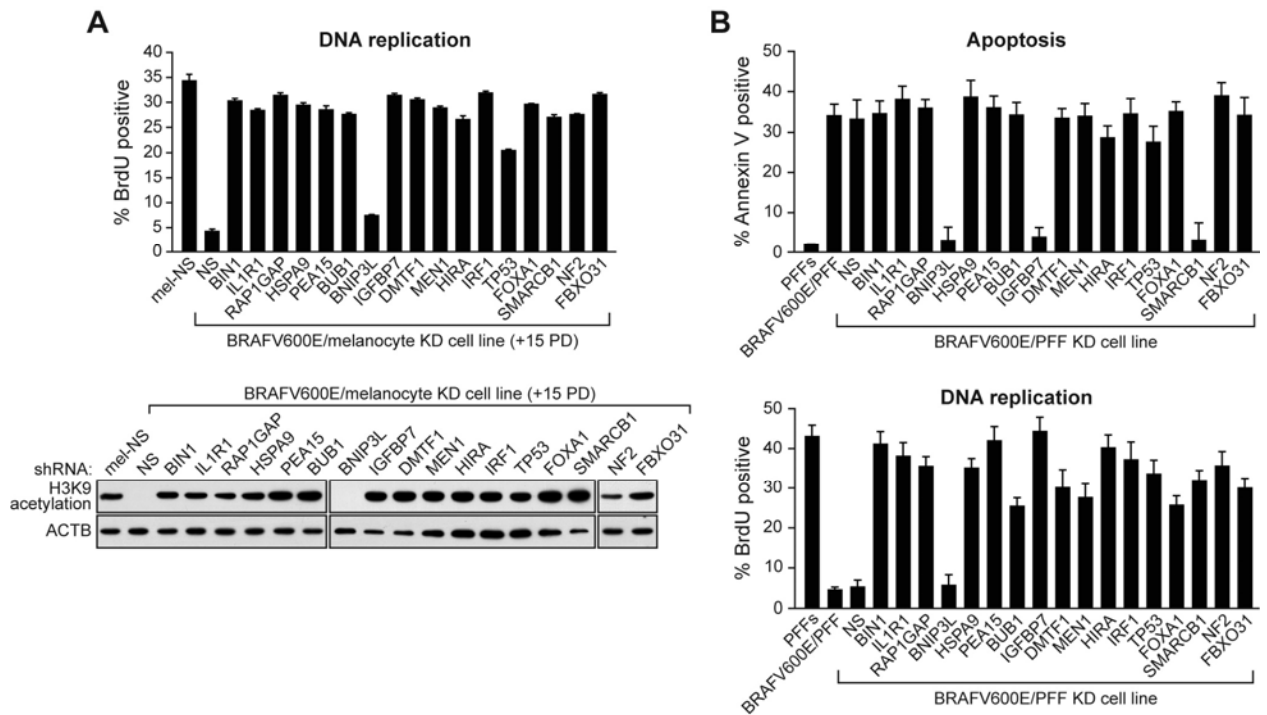

Figure S3

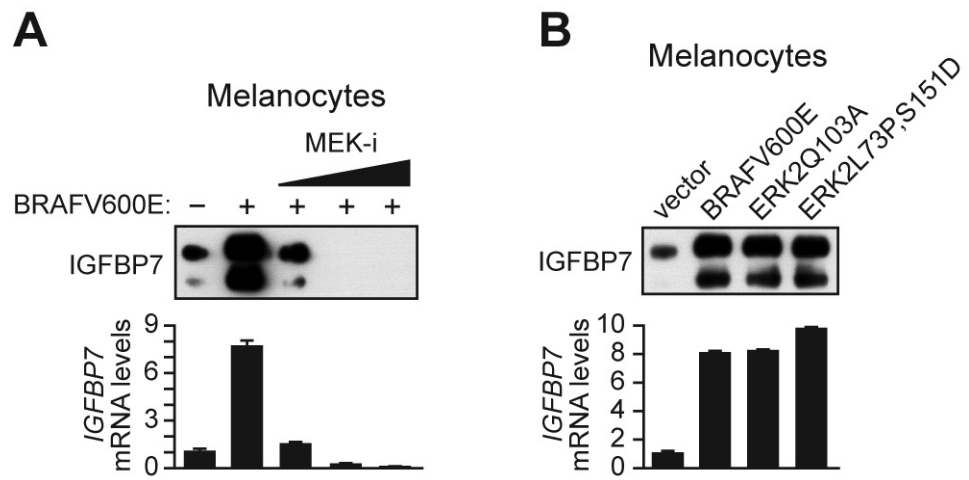



Figure S4

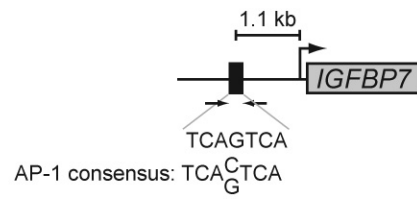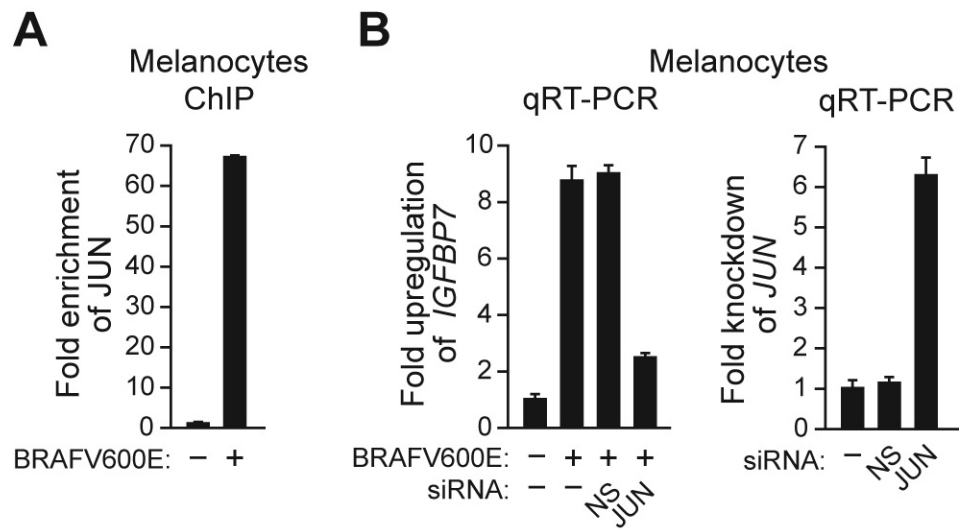

Figure S5

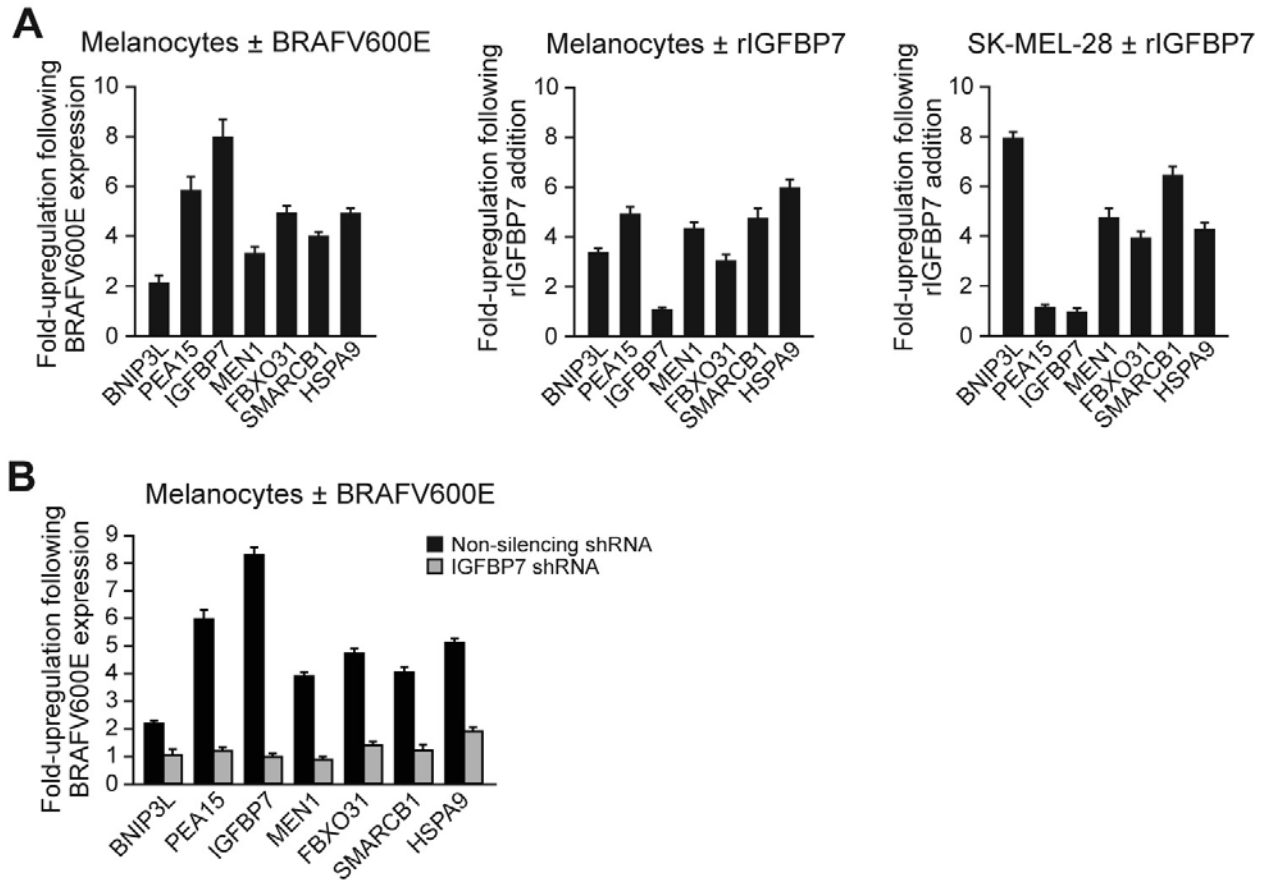

Figure S6

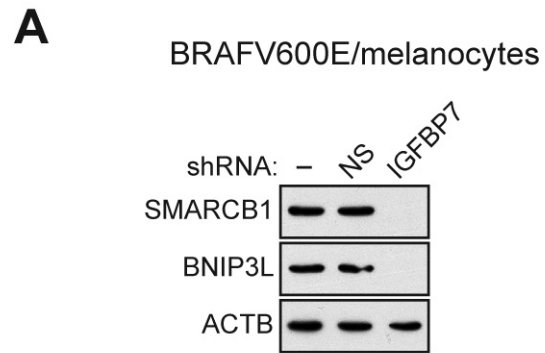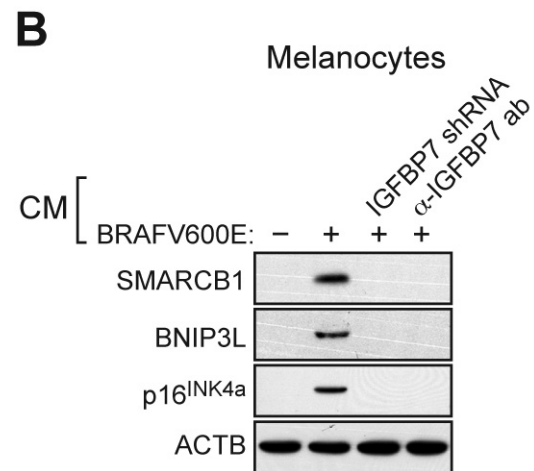

Figure S7

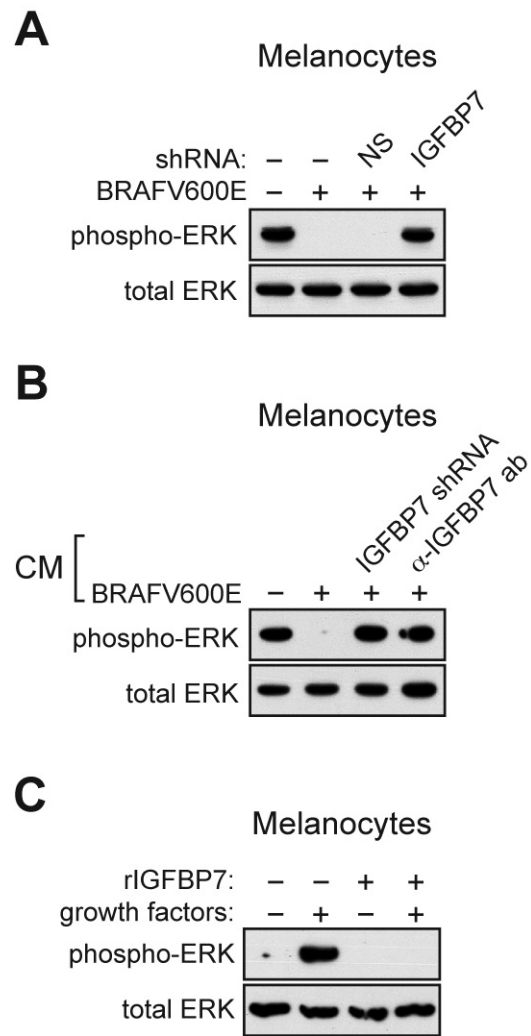

**Figure S8**

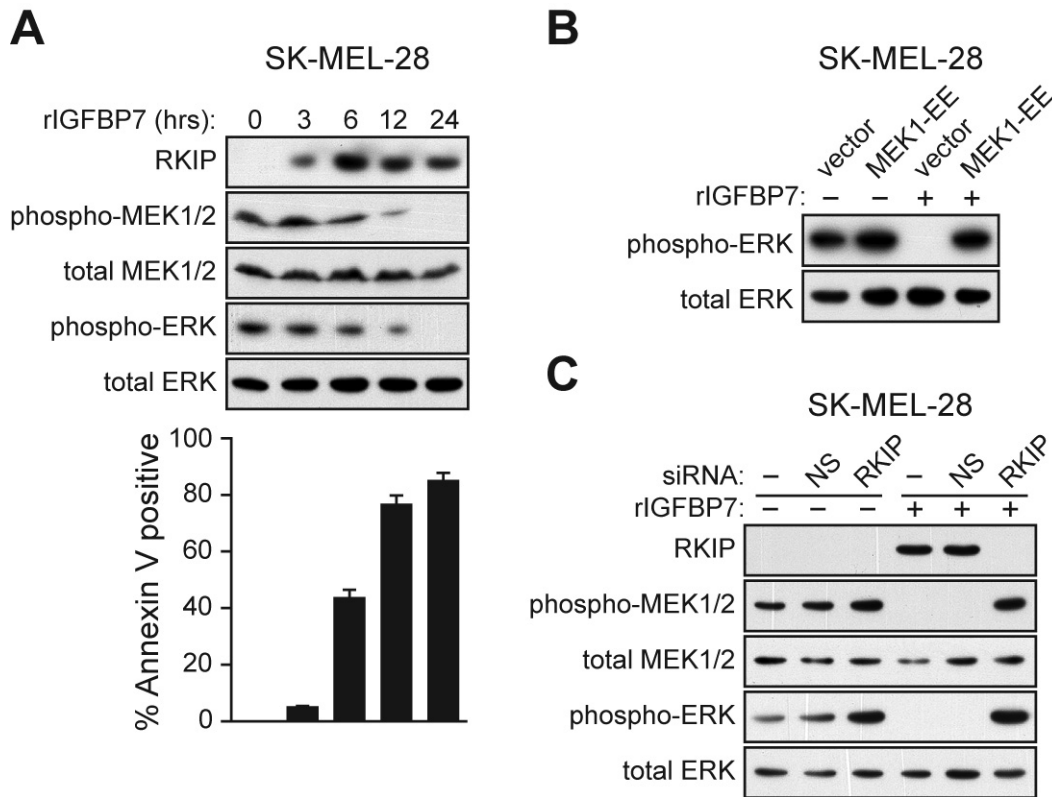

Figure S9

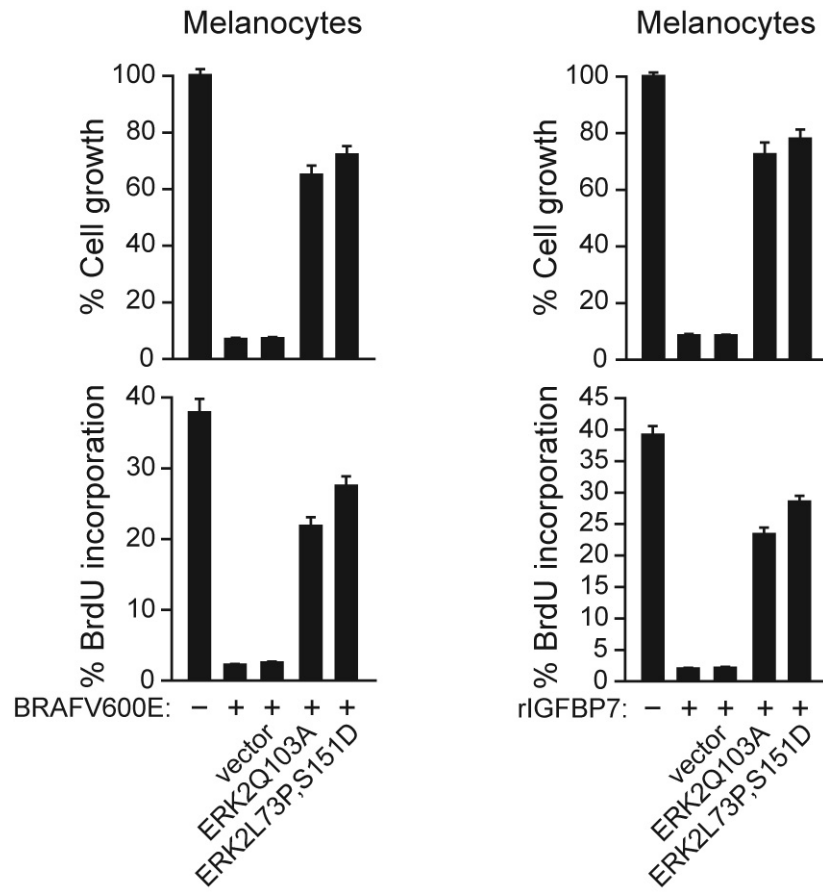

**Figure S10**

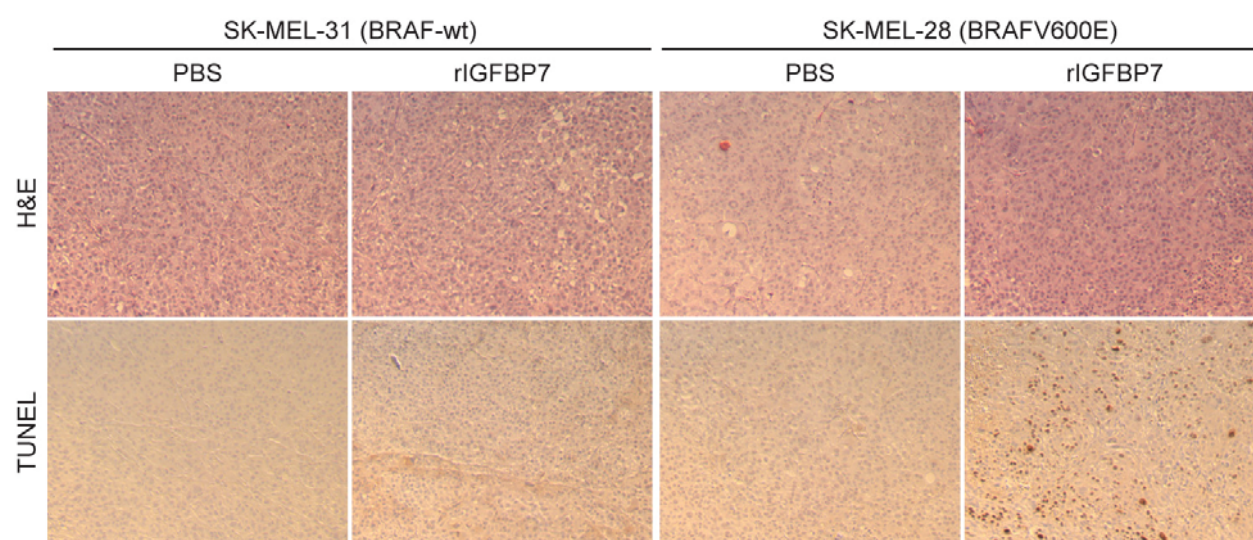

**Table S1. Genes required for BRAFV600E to block proliferation of human PFFs and melanocytes**

| <b>Biological process</b> | <b>Accession number</b> | <b>Gene symbol</b> | <b>Gene name</b>                                                                                  |
|---------------------------|-------------------------|--------------------|---------------------------------------------------------------------------------------------------|
| Apoptosis                 | NM_004331               | <i>BNIP3L</i>      | BCL2/adenovirus E1B 19kDa interacting protein 3-like                                              |
| Cell cycle regulation     | NM_004336               | <i>BUB1</i>        | budding uninhibited by benzimidazoles 1 homolog (yeast)                                           |
| Signal transduction       | NM_004305               | <i>BIN1</i>        | bridging integrator 1                                                                             |
|                           | NM_004134               | <i>HSPA9</i>       | heat shock 70 kDa protein 9 (mortalin)                                                            |
|                           | NM_001553               | <i>IGFBP7</i>      | insulin-like growth factor binding protein 7                                                      |
|                           | NM_000877               | <i>IL1R1</i>       | interleukin 1 receptor, type I                                                                    |
|                           | NM_003768               | <i>PEA15</i>       | phosphoprotein enriched in astrocytes 15                                                          |
|                           | NM_002885               | <i>RAP1GAP</i>     | RAP1 GTPase activating protein                                                                    |
| Transcription regulation  | NM_021145               | <i>DMTF1</i>       | cyclin D binding myb-like transcription factor 1                                                  |
|                           | NM_004496               | <i>FOXA1</i>       | forkhead box A1                                                                                   |
|                           | NM_002198               | <i>IRF1</i>        | interferon regulatory factor 1                                                                    |
|                           | NM_000244               | <i>MEN1</i>        | multiple endocrine neoplasia 1                                                                    |
|                           | NM_000546               | <i>TP53</i>        | tumor protein p53 (Li-Fraumeni syndrome)                                                          |
| Chromatin remodeling      | NM_003325               | <i>HIRA</i>        | HIR histone cell cycle regulation defective homolog A ( <i>S. cerevisiae</i> )                    |
|                           | NM_001007468            | <i>SMARCB1</i>     | SWI/SNF related, matrix associated, actin dependent regulator of chromatin, subfamily b, member 1 |
| Genome stability          | NM_000268               | <i>NF2</i>         | neurofibromin 2 (bilateral acoustic neuroma)                                                      |
| Unknown                   | NM_024735               | <i>FBXO31</i>      | F-box protein 31                                                                                  |



**Table S2. IGFBP7 expression in human skin, nevi and melanoma samples**

| <b>Tissue sample</b> | <b>Number</b> | <b>BRAFV600E status</b> | <b>IGFBP7 status</b> |
|----------------------|---------------|-------------------------|----------------------|
| Normal skin          | 5             | –                       | +                    |
| Benign nevi          | 20            | +                       | +                    |
| Melanoma             | 13            | +                       | –                    |
| Melanoma*            | 7             | –                       | +                    |

\* Genotyping showed that all BRAF-wild type melanomas were also wild type for RAS.

**Table S3. Source ID numbers and clone locations for shRNAs obtained from Open Biosystems, and sequences of synthesized shRNAs and siRNAs**

**Open Biosystems shRNAs**

| <b>Gene</b>         | <b>Source ID</b> | <b>Clone Location</b> |
|---------------------|------------------|-----------------------|
| <i>BIN1</i>         | V2HS_192552      | SH2136-G-11           |
|                     | V2HS_238893      | SH2490-D-11           |
| <i>BNIP3L</i>       | V2HS_15157       | SH2240-F-2            |
|                     | V2HS_15153       | SH2117-G-8            |
| <i>BUB1</i>         | V2HS_15109       | SH2335-D-10           |
|                     | V2HS_15112       | SH2123-B-6            |
| <i>CDKN2A (p16)</i> | V2HS_195839      | SH2517-C-6            |
| <i>DMTF1</i>        | V2HS_18765       | SH2249-A-4            |
|                     | V2HS_18766       | SH2114-C-10           |
| <i>FBXO31</i>       | V2HS_15701       | SH2119-C-4            |
|                     | V2HS_25023       | SH2497-B-9            |
| <i>FOXA1</i>        | V2HS_16780       | SH2118-F-5            |
|                     | V2HS_16813       | SH2260-H-2            |
| <i>HIRA</i>         | V2HS_179296      | SH2205-H-3            |
|                     | V2HS_171670      | SH2526-G-6            |
| <i>HSPA9</i>        | V2HS_173169      | SH2210-F-7            |
|                     | V2HS_263034      | SH2661-D-2            |
| <i>IGFBP7</i>       | V2HS_132291      | SH2710-D-9            |
|                     | V2HS_132289      | SH2094-C-3            |
| <i>IRF1</i>         | V2HS_133394      | SH2096-C-1            |
|                     | V2HS_133391      | SH2095-E-6            |
| <i>IL1R1</i>        | V2HS_131082      | SH2445-F-2            |
|                     | V2HS_131085      | SH2517-E-6            |
| <i>MEN1</i>         | V2HS_76534       | SH2523-E-5            |
|                     | V2HS_76605       | SH2638-A-12           |
| <i>NF2</i>          | V2HS_115769      | SH2336-C-2            |
|                     | V2HS_115768      | SH2563-F-9            |
| <i>PEA15</i>        | V2HS_23701       | SH2137-E-11           |
|                     | V2HS_23702       | SH2320-C-5            |
| <i>RAP1GAP</i>      | V2HS_175368      | SH2458-H-11           |
| <i>SMARCB1</i>      | V2HS_153159      | SH2218-F-3            |
| <i>TP53</i>         | V2HS_93615       | SH2423-C-10           |

**Synthesized shRNAs**

| <b>Gene</b>    | <b>Sequence (5' -&gt; 3')</b>                                                                         |
|----------------|-------------------------------------------------------------------------------------------------------|
| <i>RAP1GAP</i> | TGCTGTTGACAGTGAGCGCGCCACCAGTGTGACCCTGTTATAGTGAAGC<br>CACAGATGTATAACAGGGTCACACTGGTGGCTTGCCTACTGCCTCGGA |
| <i>SMARCB1</i> | TGCTGTTGACAGTGAGCGCTCACTGATTGTCCCTGGGAAGTAGTGAAGC<br>CACAGATGTACTTCCCAGGGACAATCAGTGATTGCCTACTGCCTCGGA |
| <i>TP53</i>    | TGCTGTTGACAGTGAGCGACCTGTGCAGCTGTGGGTTGATTAGTGAAGC<br>CACAGATGTAATCAACCCACAGCTGCACAGGGTGCCTACTGCCTCGGA |

### Synthesized siRNAs

| <b>Gene</b>   | <b>Sequence (5' -&gt; 3')</b> |
|---------------|-------------------------------|
| <i>JUN</i>    | GGAACAGGTGGCACAGCTT           |
| <i>RKIP</i>   | CACTCACTCTGATTTATGT           |
| <i>STAT1</i>  | CCCAGAATGCCCTGATTAA           |
| Non-silencing | AACACCGAACGAGACACGA           |

**Table S4. Primers used for quantitative real time RT-PCR, ChIP, *BRAF* genotyping and bisulfite sequencing**

**RT-PCR**

| Gene           | Forward or reverse primer | Sequence (5' → 3')   |
|----------------|---------------------------|----------------------|
| <i>BIN1</i>    | forward                   | TCTCCAGAAGCTGGGGAAGG |
|                | reverse                   | TCCATCCACAGCAGGTCGTT |
| <i>BNIP3L</i>  | forward                   | CGGACTCGGCTTGTGTGTT  |
|                | reverse                   | ATGGGTAGCTCCACCCAGGA |
| <i>BUB1</i>    | forward                   | GATGCTTGAAGCCACATGC  |
|                | reverse                   | AGGGGATGACAGGGTTCCAA |
| <i>JUN</i>     | forward                   | GGTAGCAGATAAGTGTTGAG |
|                | reverse                   | GGCGCTAGCTCTGGGCAGTT |
| <i>DMTF1</i>   | forward                   | AGCCAAGAGGCCAACCTGTC |
|                | reverse                   | CCTGGCTGGAGCTGTTCTCA |
| <i>FBXO31</i>  | forward                   | AATCCGGCCTTTTGACCAGA |
|                | reverse                   | TCCGCTCACAGGAAGAGCAC |
| <i>FOXA1</i>   | forward                   | GGAGCCGGCGTACTACCAAG |
|                | reverse                   | TTTTGCACTGGGGGAAAGGT |
| <i>HIRA</i>    | forward                   | ACACTCTCGCCGCTGATGAC |
|                | reverse                   | GGGGCTAGTGTCCACCTTGG |
| <i>HSPA9</i>   | forward                   | ACGGGAAGCTGCTGAAAAGG |
|                | reverse                   | TGGGGCTCTGCCAAAAGAT  |
| <i>IGFBP7</i>  | forward                   | GGCATGGAGTGCCTGAAGAG |
|                | reverse                   | CTTGCTGACCTGGGTGATGG |
| <i>IRF1</i>    | forward                   | CCGTTCTTGCCCTCCTGAGT |
|                | reverse                   | TCCATGGCCTCTGCCTTACA |
| <i>IL1R1</i>   | forward                   | TCTTGCCTCGACCCTTCCTC |
|                | reverse                   | TGCTCCTGGAAGGCAGTGAG |
| <i>MEN1</i>    | forward                   | CAGGGGCCAGACAGTCAATG |
|                | reverse                   | GGTGGGCTCCAGCTCCTCTA |
| <i>NF2</i>     | forward                   | TCGGGCCCTGAATTTTCTGT |
|                | reverse                   | GAGGTTGCAGTGAGCCGAGA |
| <i>PEA15</i>   | forward                   | CTAGGGGAGGGGGCTGAGTT |
|                | reverse                   | GGTGGGGGTTGAGTGGTCTC |
| <i>RAP1GAP</i> | forward                   | GGCAGACCTCCGAGGAAGAA |
|                | reverse                   | GGAAGACCACAGCCACGATG |
| <i>SMARCB1</i> | forward                   | TCTGGATTTGAACCCGCTGA |
|                | reverse                   | TGCTGTATGCGATGGTGGTG |
| <i>STAT1</i>   | forward                   | GTTAGAAAAGCAAGACTG   |
|                | reverse                   | CATCTGGATTGGGTCTTCC  |
| <i>TP53</i>    | forward                   | AGCTCCCAGAATGCCAGAGG |
|                | reverse                   | AAGCCCAGACGGAAACCGTA |

**ChIP**

| Gene           | Forward or reverse primer | Sequence (5' → 3')   |
|----------------|---------------------------|----------------------|
| <i>BNIP3L</i>  | forward                   | CCTCATTCCGTTTCTCCTCA |
|                | reverse                   | GCCCAGGCCACGTGATGA   |
| <i>IGFBP7</i>  | forward                   | GATTGGAGGATGTTTCCC   |
|                | reverse                   | CATGTCACATTGTGGTTCTT |
| <i>SMARCB1</i> | forward                   | TGCTACAGTGGCTTCTTAAC |
|                | reverse                   | TTCTACCCGAGGTTAGT    |

**BRAF Genotyping**

Forward primer: 5'-TCATAATGCTTGCTCTGATAGGA-3'

Reverse primer: 5'-GGCCAAAATTTAATCAGTGGA-3'

**Bisulfite Sequencing**

Forward primer: 5'-GAGAAATTAGAGGGTGGGAAG-3'

Reverse primer: 5'-AACAAAAACAACAACCCAAC-3'
